# Supplementary material for: Cesium lead bromide as a colorimetric and fluorometric sensing platform for the selective detection of uric acid
Source: Royal Society of Chemistry journal article supplement (doi:10.1039/d3nj00202k), 2023-01-01
Supplement: d3nj00202k1.pdf [file d3nj00202k1.pdf]

## Electronic Supplementary Information

### **Cesium Lead Bromide as a colorimetric and fluorometric sensing platform for selective detection of Uric Acid**

Priyankamoni Saikia,<sup>a</sup> Jayashree Nath,<sup>a</sup> Swapan Kumar Dolui,<sup>\*a</sup> and Sanjeev Pran Mahanta<sup>\* a</sup>

<sup>a</sup>*Department of Chemical Sciences, Tezpur University, Sonitpur, 784028, Assam.*

Corresponding authors email id: [spm@tezu.ernet.in](mailto:spm@tezu.ernet.in) & [dolui@tezu.ernet.in](mailto:dolui@tezu.ernet.in)

## CONTENTS

1. Experimental Section.
2. Time-resolved Photo-luminescence decay graph of CsPbBr<sub>3</sub> (**Figure S1**).
3. Selected area diffraction (SAED) pattern of CsPbBr<sub>3</sub> (**Figure S2**).
4. FT-IR spectra of CsPbBr<sub>3</sub> (**Figure S3**).
5. (a) FT-IR spectra of CsPbBr<sub>3</sub> titrated with various concentrations of UA (b) P-XRD spectra of CsPbBr<sub>3</sub> after exposure to 1.33 microM UA. (c) FE-SEM image of CsPbBr<sub>3</sub>(d) FE-SEM image of structural degradation after adding UA to CsPbBr<sub>3</sub> (**Figure S4**).
7. Solid-state UV-Vis absorption of CsPbBr<sub>3</sub> titrated with various concentrations of UA (**Figure S5**).
8. PL intensity of CsPbBr<sub>3</sub> with the addition of different volumes of H<sub>2</sub>O (**Figure S6**).
9. Effect of different buffer solutions on the sensing performance of CsPbBr<sub>3</sub> (**Figure S7**).
10. Stability of CsPbBr<sub>3</sub> dispersion with respect to time under 80% humid condition and Photostability of CsPbBr<sub>3</sub> dispersion under the illumination of 365nm wavelength UV-lamp. (**Figure S8**).
10. Line chart of the respective lifetimes of systems. (**Figure S9**).
11. Summary of optical properties of CsPbBr<sub>3</sub> (**Table S1**).
12. Concentration-dependent lifetime values (**Table S2**).
13. A Comparative study of a few fluorescence sensor probe systems for the detection of UA (**Table S3**).
14. Sensing applications of Perovskite nanostructure (**Table S4**).
15. References.

## EXPERIMENTAL SECTION

**Materials.** Cesium Bromide (CsBr, 99.9%, Alfa Aesar), Lead Bromide (PbBr<sub>2</sub>, 99.9 %, TCI), Dimethyl Sulfoxide (DMSO, 99%, Alfa Aesar), Toluene (99 % Alfa Aesar), Uric Acid (Sigma Aldrich), Urea (Sisco Research Laboratories), Glycine (Alfa Aesar), Ascorbic Acid (Alfa Aesar), Uracil (Alfa Aesar), Alanine (Sigma Aldrich), Glucose (Sigma Aldrich), Adenine (Alfa Aesar), Cystine (Alfa Aldrich), NaCl (Alfa Aldrich), KCl (Alfa Aldrich), Creatinine (Sigma Aldrich), Hippuric Acid (TCI) were commercially available. All chemicals were used without purification.

**Instruments.** The fluorescence emission spectra were recorded using a Hitachi F-2700 fluorescence spectrophotometer at room temperature. The decay of fluorescence spectra was measured using (Horiba Scientific, instrument) model. The surface morphologies of CsPbBr<sub>3</sub> metal halide perovskites (MHPs) were analyzed by using Gemini 500 FE-SEM instrument and energy dispersive compositional mappings were recorded by using SEM (JEOL-JSM-6390LV). The High-resolution Transmission electron microscope (HR-TEM) images were captured using (Model: JEM-2100, JEOL, USA). XRD was measured with Bruker D8 advanced eco P-XRD system. The FTIR spectra of the samples were performed using a Nicolet Impact-410 IR spectrometer (USA) in the KBr medium at room temperature in the range of 4000–400 cm<sup>-1</sup>. A Shimadzu UV-2550 spectrophotometer was used to record the electronic absorption spectra of the samples in the wavelength range of 200-800 nm. The chemical compositions were analyzed by X-ray photoelectron spectroscopy (XPS, Perkin Elmer model 1257), instrument.

**Preparation of perovskite CsPbBr<sub>3</sub>.** Perovskites are prepared through the traditional one-pot anti-solvent method at room temperature.<sup>1-2</sup> First 2.5 mmol of Cesium Bromide (CsBr) (0.5320 g) and 2 mmol of Lead (II) Bromide (PbBr<sub>2</sub>) (0.734 g) were added to 15 mL DMSO. The solution was stirred for 12 h until the solid completely dissolved. Later the solution was quickly injected into 150 mL of toluene. The obtained product was centrifuged and washed with toluene and then placed in a vacuum oven at 80 °C.

**Measurement of Fluorescence lifetime.** The relative PLQY of the passivated perovskites were measured while taking Rhodamine B as a reference (Quantum Yield = 97 % in ethanol) with the equations as follows.<sup>3-4</sup>

$$\Phi_{fx} = \frac{\eta_x^2}{\eta_{Rhodamine\ Blue}^2} \cdot \frac{A_{Rhodamine\ Blue}}{A_x} \cdot \frac{F_x}{F_{Rhodamine\ Blue}} \cdot \Phi_{fRhodamine\ Blue}$$

Where  $\eta$  is the refractivity ( $\eta = 1.36$  for ethanol and  $\eta = 1.49$  for toluene),  $A$  is the absorbance which is basically lower than 0.01 to avoid internal filter effects and  $F$  is the integral absorption area in the luminescence spectra.<sup>4</sup>

#### **Methods for stability experiments:**

0.1 mmol of CsPbBr<sub>3</sub> (0.057 g) was dispersed in 10 mL toluene and sonicated for 30 mins to get a homogeneous mixture. 3 mL of perovskite solution was aliquot in a cuvette and their respective luminescence peak was recorded under the excitation wavelength of 380 nm with the different interval of time under 80% humid condition. The photostability test was performed while dispersing 0.057 g of perovskite in a 10 mL toluene. Then 3 mL from the above solution was taken as a stock solution. The solution was further illuminated under the wavelength of 365 nm UV-lamp for a period of 8 hours. Their changes in PL intensity were measured under the excitation wavelength of 380 nm.

**Fluorescence Assay of Uric-Acid using CsPbBr<sub>3</sub>-based sensor.** To carry out the fluorescence titration experiment a suspension of CsPbBr<sub>3</sub> perovskite in toluene having a concentration of (0.57 g/100 mL) was prepared and sonicated for 30 mins to get a homogeneous suspension. 3 mL of this suspension was placed in a quartz cuvette and to that 50  $\mu$ L volume of UA solution with known concentration is added. The fluorescence spectra were measured with an excitation wavelength of 380 nm.

**Detection of Uric Acid in real samples.** The serum samples were collected as left-out blood serum samples from Pathology section of the Health Centre of Tezpur University (Napaam, Tezpur) with due consent from the hospital authority. The samples were diluted 100 times. Then the samples were mixed with different concentrations of UA for fluorescence measurements. The fluorescence spectra of as measured samples were monitored and then the recovery rate of the blood samples was calculated under the excitation wavelength of 380 nm.

**The paper-based sensor of the perovskite CsPbBr<sub>3</sub> for UA sensing.** To investigate the visual detection of Uric Acid by CsPbBr<sub>3</sub>, a paper sensor was fabricated where 1 mL of dispersed perovskite solutions were first added to 1cm $\times$ 1cm cellulose paper respectively. After then a

few drops of UA with varying concentrations were dripped into the following paper. The fluorescence colour response was observed under the UV emitting lamp of 365 nm wavelength.

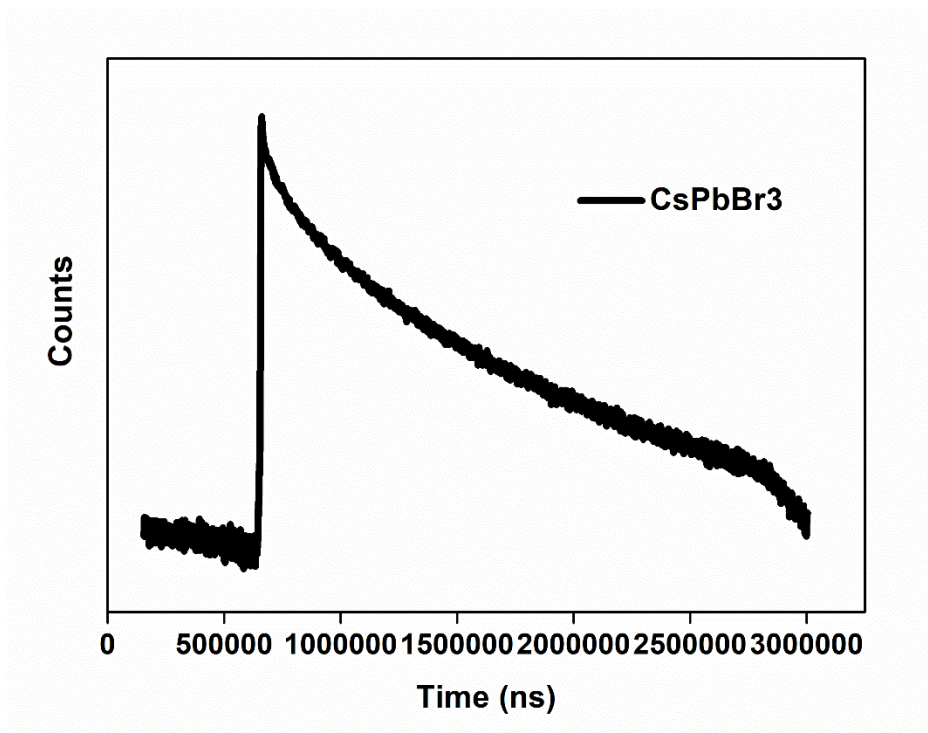

**Figure S1.** Time-resolved Photo-luminescence decay graph of CsPbBr<sub>3</sub>.

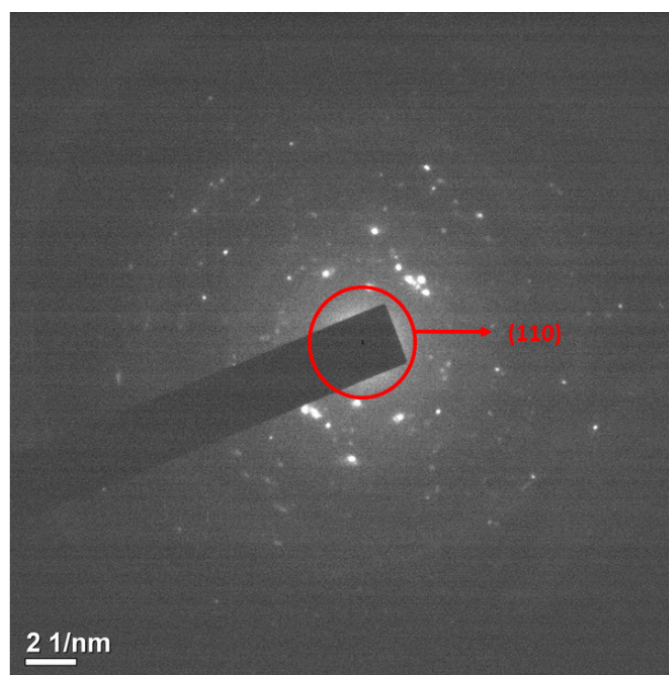

**Figure S2.** Selected area diffraction (SAED) pattern of CsPbBr<sub>3</sub>.

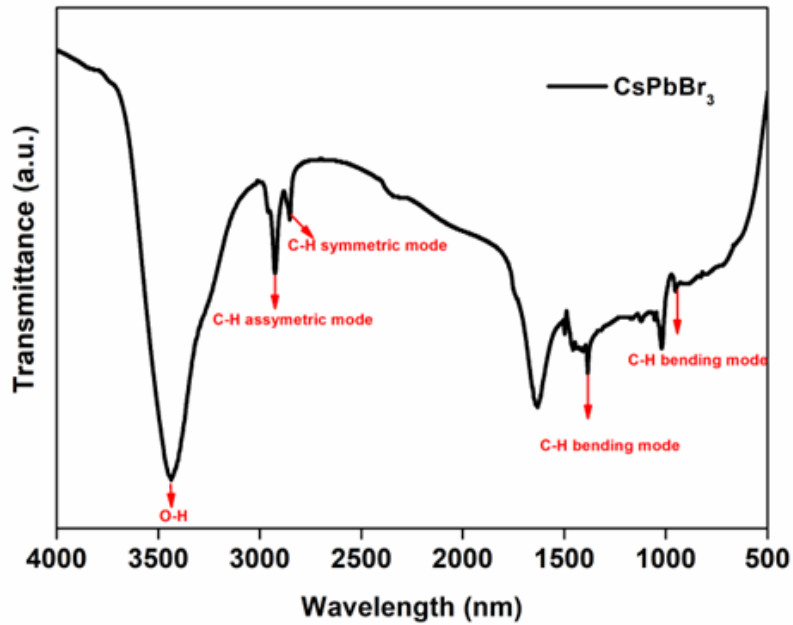

Figure S3. FT-IR spectra of CsPbBr<sub>3</sub>.

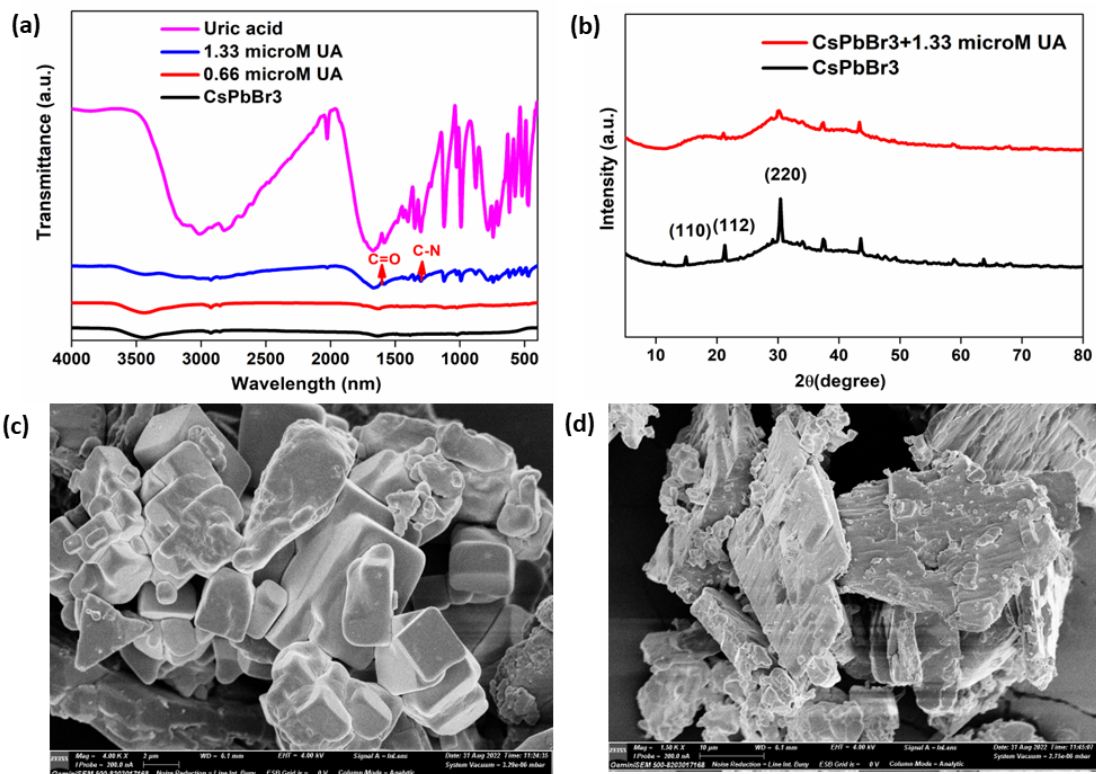

Figure S4. (a) FT-IR spectra of CsPbBr<sub>3</sub> titrated with various concentrations of UA (b) P-XRD spectra of CsPbBr<sub>3</sub> after exposure to 1.33 microM UA. (c) FE-SEM image of CsPbBr<sub>3</sub>(d) FE-SEM image of structural degradation after adding UA to CsPbBr<sub>3</sub>.

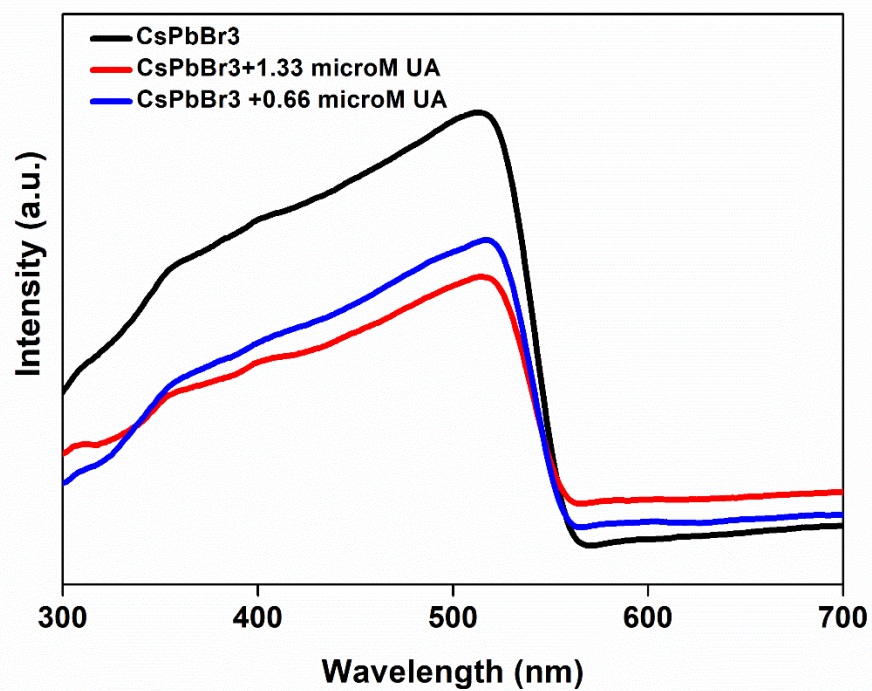

**Figure S5.** Solid-state UV-Vis absorption of CsPbBr<sub>3</sub> titrated with various concentrations of UA.

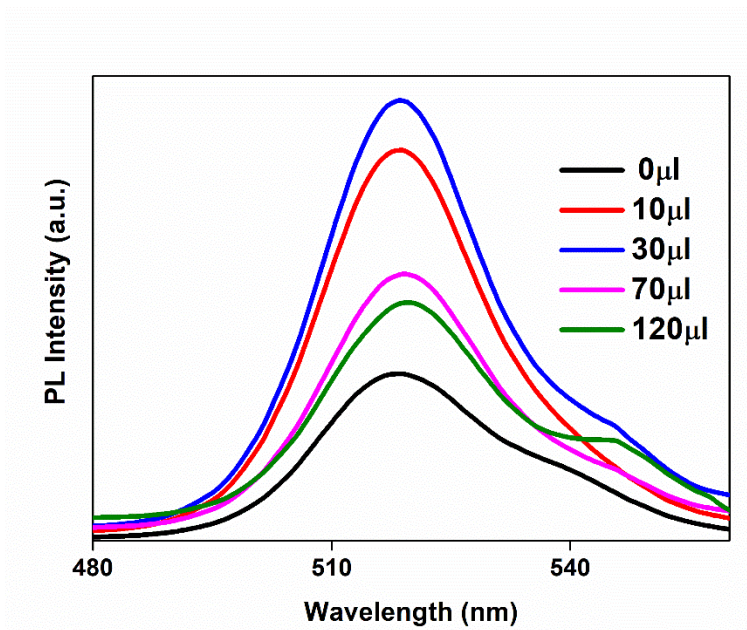

**Figure S6.** The PL intensity of CsPbBr<sub>3</sub> with the addition of different volumes of water.



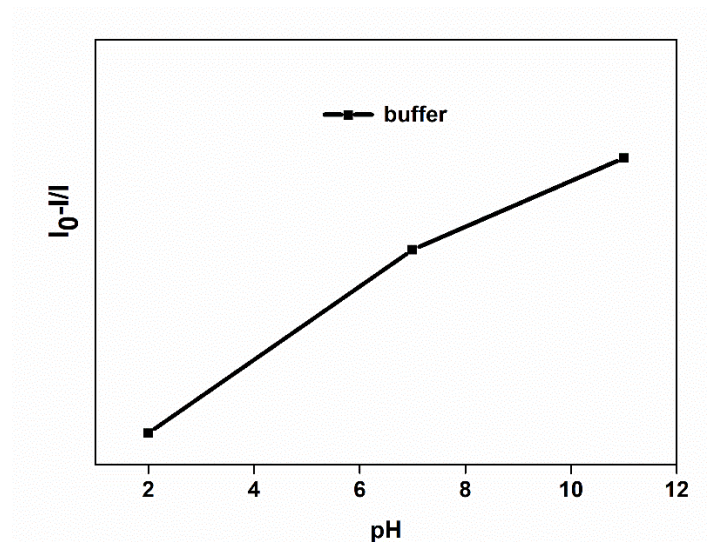

**Figure S7.** Effect of different buffer solutions (acidic: HCl + KCl, pH=2 neutral: phosphate, pH=7 and basic: NaHCO<sub>3</sub> and Na<sub>2</sub>CO<sub>3</sub> pH=10.6 ) on the sensing performance of CsPbBr<sub>3</sub>.

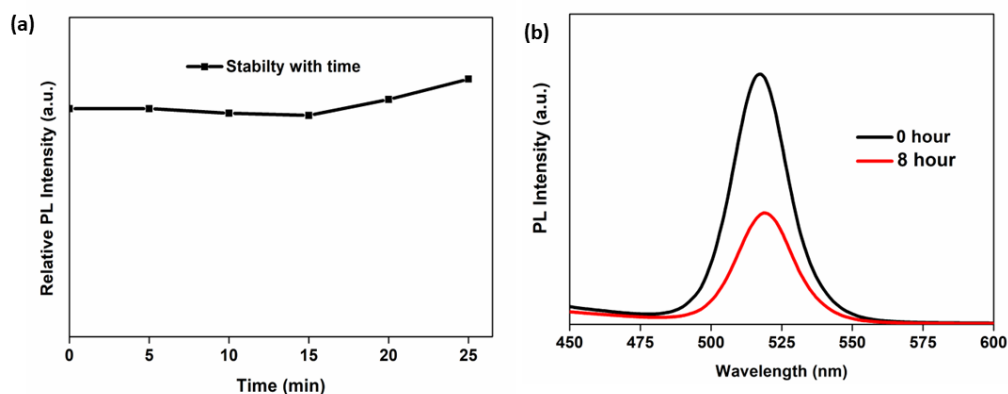

**Figure S8.** (a) Stability of CsPbBr<sub>3</sub> dispersion with respect to time under humid condition 80% and (b) Photostability of CsPbBr<sub>3</sub> dispersion under the illumination of 365nm wavelength UV-lamp.

**Table S1.** Summary of optical properties of CsPbBr<sub>3</sub>

|                     | FWHM  | PLQY (%) | $\lambda_{max}$<br>(absorption) | $\lambda_{max}$<br>(luminescence) | Band gap |
|---------------------|-------|----------|---------------------------------|-----------------------------------|----------|
| CsPbBr <sub>3</sub> | 20 nm | 60       | 530 nm                          | 520 nm                            | 2.6 eV   |

**Table S2.** Concentration-dependent lifetime values

| System                            | $\tau$ 1(ns) | $\tau$ 2 (ns) | $\tau$ av (ns) |
|-----------------------------------|--------------|---------------|----------------|
| CsPbBr <sub>3</sub>               | 21.19        | 10.95         | 8.76           |
| CsPbBr <sub>3</sub> +0.66 $\mu$ M | 10.8         | 21.7          | 8.64           |
| CsPbBr <sub>3</sub> +1.33 $\mu$ M | 1.01         | 20.3          | 8.15           |

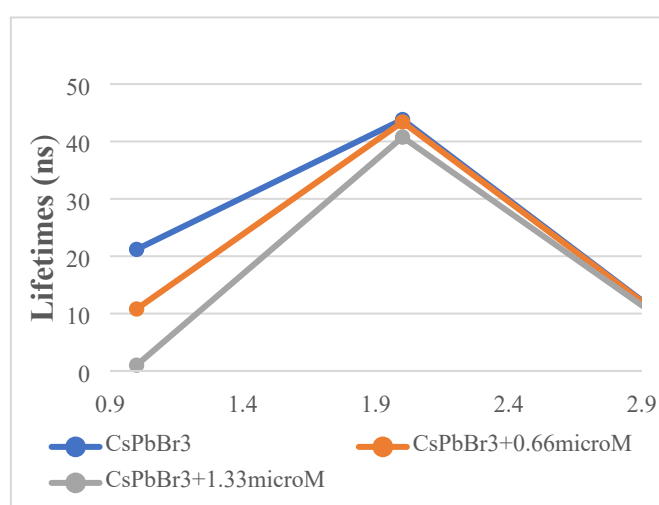**Figure S9.** Line chart of the respective lifetimes of systems.**Table S3.** A Comparative study of a few fluorescence sensor probe systems for detection of UA

| Sensor probe                                           | LOD( $\mu$ M) | ref       |
|--------------------------------------------------------|---------------|-----------|
| CsPbBr <sub>3</sub>                                    | 0.373         | This work |
| Cu <sup>2+</sup> @ MIL-91 (Al: Eu)                     | 1.6           | 5         |
| N-MWCNTs/ PtNPs                                        | 2.1           | 6         |
| Xerogel                                                | <10           | 7         |
| AuNCs                                                  | 6.6           | 8         |
| Uricase/HRP-CdS QDs                                    | 125           | 9         |
| NaYF <sub>4</sub> :Yb <sup>3+</sup> , Tm <sup>3+</sup> | 6.7           | 10        |

|                                                                           |        |    |
|---------------------------------------------------------------------------|--------|----|
| CuInS/ZnS                                                                 | 0.05   | 11 |
| CS-AuNC/PVP-AuNP                                                          | 1.7    | 12 |
| Hf-UiO-66-Py MOF                                                          | 1.4    | 13 |
| Pyrene-based amphiphilic receptor                                         | 0.0031 | 14 |
| CdTe (Quantum dots) coated with 2- Mercaptoethylamine                     | 0.103  | 15 |
| Carbon dot from pork                                                      | 0.05   | 16 |
| Carbon dot entrapped in Cr-MOF                                            | 1.3    | 17 |
| Eu-MOF                                                                    | 0.689  | 18 |
| UiO-PSM                                                                   | 0.0023 | 19 |
| COOH-nanoflakes                                                           | 1      | 20 |
| CdTe capped with (glutathione, 3-mercaptopropionic acid and thioglycerol) | 0.1    | 21 |
| Luminol - terbium                                                         | 0.028  | 22 |
| Carbon -dot with MnO <sub>2</sub>                                         | 0.045  | 23 |
| Carbon-dot with MONT                                                      | 4.3    | 24 |
| 3- mercaptopropionic acid capped ZnS: Zn-CuS                              | 0.044  | 25 |

**Table S4.** Sensing applications of perovskite nanostructure

| <b>Perovskite sensing probe</b>                        | <b>Detection method</b> | <b>Analyte</b>               | <b>Ref.</b> |
|--------------------------------------------------------|-------------------------|------------------------------|-------------|
| Cs <sub>4</sub> PbBr <sub>6</sub> @CsPbBr <sub>3</sub> | Electrochemiluminescent | Bisphenol A                  | 26          |
| Cs <sub>4</sub> PbBr <sub>6</sub> @CsPbBr <sub>3</sub> | Fluorescence            | 2,4 dinitrophenyl hydrazine  | 27          |
| CsPbBr <sub>3</sub>                                    | Electrochemical         | Human respiration monitoring | 28          |
| ZnO/ CsPbBr <sub>3</sub>                               | Electrochemical         | NO <sub>2</sub>              | 29          |

|                                                                                            |                 |                                      |    |
|--------------------------------------------------------------------------------------------|-----------------|--------------------------------------|----|
| CsPbBr <sub>3</sub>                                                                        | Fluorescence    | Water content in herbal medicine     | 30 |
| MIP@CsPbBr <sub>3</sub>                                                                    | Fluorescence    | Omethoate                            | 31 |
| Tributylene oxide-CsPbBr <sub>3</sub>                                                      | Electrochemical | H <sub>2</sub> S                     | 32 |
| NH <sub>2</sub> functionalized CsPbBr <sub>3</sub>                                         | Fluorescence    | Iodide ion                           | 33 |
| Molecularly imprinted mesoporous silica - CsPbBr <sub>3</sub>                              | Fluorescence    | 2,2 dichlorovinyl dimethyl phosphate | 34 |
| Al <sub>2</sub> O <sub>3</sub> , BaTiO <sub>3</sub> /TiO <sub>2</sub> @CsPbBr <sub>3</sub> | Electrochemical | Humidity                             | 35 |
| Ag <sup>+</sup> @UiO-66-NH <sub>2</sub> decorated CsPbBr <sub>3</sub>                      | Electrochemical | Nitrofurazone                        | 36 |
| MIP@CsPbBr <sub>3</sub>                                                                    | Fluorescence    | Phoxim                               | 37 |
| Cu/CsPbBr <sub>3</sub>                                                                     | Fluorescence    | Glucose                              | 38 |
| EMT zeolite/CsPbBr <sub>3</sub>                                                            | Fluorescence    | Humidity                             | 39 |
| Cellulose/ CsPbBr <sub>3</sub>                                                             | Colorimetric    | Cl <sup>-</sup> /I <sup>-</sup>      | 40 |
| Eu@BTC/ CsPbBr <sub>3</sub>                                                                | Fluorescence    | Hg <sup>2+</sup>                     | 41 |
| CsPbBr <sub>3</sub>                                                                        | Fluorescence    | Hg <sup>2+</sup>                     | 42 |
| Ti <sub>3</sub> C <sub>2</sub> T <sub>x</sub> -MXene-CsPbBr <sub>3</sub>                   | Fluorescence    | Cd <sup>2+</sup>                     | 43 |
| SiO <sub>2</sub> @CsPbBr <sub>3</sub>                                                      | Fluorescence    | Cl <sup>-</sup>                      | 44 |
| CsPbBr <sub>3</sub>                                                                        | Fluorescence    | Cu <sup>2+</sup>                     | 45 |
| m-PEG@SiO <sub>2</sub> /CsPbBr <sub>3</sub>                                                | Fluorescence    | Glutathione/Hg <sup>2+</sup>         | 46 |
| CsPbBr <sub>3</sub>                                                                        | Fluorescence    | Cl <sup>-</sup> in sweat             | 47 |
| CQD@CTAB/CsPbBr <sub>3</sub>                                                               | Fluorescence    | Fe <sup>3+</sup>                     | 48 |
| Eu <sup>3+</sup> /CsPbBr <sub>3</sub>                                                      | Fluorescence    | Temperature                          | 49 |
| ZnO/ CsPbBr <sub>3</sub>                                                                   | Electrochemical | NO <sub>2</sub>                      | 50 |
| COOH/CsPbBr <sub>3</sub>                                                                   | Fluorescence    | Mycobacterium Tuberculosis           | 51 |

|                                                                  |                           |                   |    |
|------------------------------------------------------------------|---------------------------|-------------------|----|
| APTES/<br>Cs <sub>4</sub> PbBr <sub>6</sub> @CsPbBr <sub>3</sub> | Fluorescence              | Fe <sup>3+</sup>  | 52 |
| APTES/CsPbBr <sub>3</sub>                                        | Fluorescence              | Tetracycline      | 53 |
| CsPbBr <sub>3</sub>                                              | Fluorescence/Colorimetric | Benzoyl Peroxide  | 54 |
| CsPbBr <sub>3</sub>                                              | Fluorescence              | Chloride/Arsenite | 55 |
| SiO <sub>2</sub> @gold/CsPbBr <sub>3</sub>                       | Fluorescence              | Cu <sup>2+</sup>  | 56 |

### References:

1. H. Huang, H. Yuan, P. K., Janssen, G. Solis-Fernandez, Y. Wang, Y. C. Tan and B. M. Roeffaers, *ACS Energy Letters*, 2018, **3**, 755-759.
2. R. Chang, H. Jin, M. Roeffaer, J. Hoffkens and E. Debroyee, *ACS Omega*, 2020, **5**, 24495-24503.
3. A. M. Brouwer, *Pure and Applied Chemistry*, 2011, **83**, 2213-2228.
4. S. Wang, C. Bi, J. Yuan, L. Zhang and J. Tian, *ACS Energy Letters*, 2017, **3**, 245-251.
5. X. Lian and B. Yan, *Inorganic chemistry*, 2017, **56**, 6802-6808.
6. G. N. Tsierekzos, H. S. Othman, U. Ritter, L. Hafermann, A. Knauer, M. J. Köhler and K. E. McCarthy, *Sensors and Actuators B: Chemical* 2016, **231**, 218-229.
7. E. G. Conway, H. R. Lambertson, A. M. Schwarzmann, J. M. Pannell, W. H. Kerins, J. K. Rubenstein and C. M. Leopold, *Journal of Electroanalytical Chemistry*, 2016, **775**, 135-145.
8. J. Wang, Y. Chang, B. W. Wu, P. Zhang, Q. S. Lie and Z. C. Huang, *Talanta*, 2016, **152**, 314-320.
9. E. N. Azmi, I. N. Ramli, J. Abdullah, A. A. M. Hamid, H. Sidek, S. Abd Rahman and A. N. Yusof, *Biosensors and Bioelectronics* 2015, **67**, 129-133.
10. Q. Long, A. Fang, Y. Wen, H. Li, Y. Zhang and S. Yao, *Biosensors and Bioelectronics*, 2016, **86**, 109-114.
11. F. Zhang, P. Ma, X. Deng, Y. Sun, X. Wang and D. Song, *Microchimica Acta*, 2018, **185**, 1-8.
12. Y. Liu, H. Li, B. Guo, L. Wei, B. Chen and Y. Zhang, *Biosensors and Bioelectronics*, 2017, **91**, 734-740.
13. R. Dalapati and S. Biswas, *Inorganic chemistry*, 2019, **9**, 5654-5663.

14. N. Dey and S. Bhattacharya, *Analytical chemistry*, 2017, **19**, 10376-10383.
15. T. Zhang, X. Sun and B. Liu, *Spectrochimica Acta Part A: Molecular and Biomolecular Spectroscopy*, 2011, **5**, 1566-1572.
16. C. Zhao, Y. Jiao, F. Hu and Y. Yang, *Spectrochimica Acta Part A: Molecular and Biomolecular Spectroscopy*, 2018, **190**, 360-367.
17. A. B. O. Shatery and M. K. Omer, *ACS omega*, **2022**, 19, 16576-16583.
18. J. L. Han, J. Y. Kong, Z. G. Hou, C. H. Chen, M. X. Zhang and G. H. Zheng, H. G. *Inorganic Chemistry*, **2020**, 10, 7181-7187.
19. S. Qu, Z. Li and Q. Jia, Q. *ACS applied materials & interfaces*, **2019**,11, 34196-34202.
20. Y. Z. Mao, N. L. Zhu, J. Gao, J. J. Liu, H. Y. Wei, Y. X. Li and J. Wang, *Analytical Methods*, **2018**, 10, 4951-4957.
21. D. Jin, H. M. Seo, T. B. Huy, T. Q. Pham, L. M. Conte, D. Thangadurai and I. Y. Lee, *Biosensors and Bioelectronics*, **2016**, 77, 359-365.
22. W. Qi, M. Zhao, Y. Fu, H. He, X. Tian, D. Wu, P. P. Hu, *Dyes and Pigments*, **2020**, 172, 107797.
23. J. Yang, Z. Huang, Y. Hu, J. Ge, J. Li, Z. Li, *New Journal of Chemistry*, **2018**, 42, 15121-15126.
24. X. Xin, M. Zhang, J. Zhao, C. Han, X. Liu, Z. Xiao and D. Sun, *Journal of Materials Chemistry C*, **2017**, 5, 601-606.
25. M. Wang, W. Niu, X. Wu, L. Li, j. Yang, S. Shuang and C. Dong, *RSC Advances*, **2014**, 4, 25183-25188.
26. R. Sun, X. Yu, J. Chen, W. Zhang, Y. Huang, J. Zheng and Y. Chi, *Analytical Chemistry*, **2022**, 94, 17142-17150.
27. M. Yang, Y. Yan, E. Liu, Q. Sun and J. Fan, *J. Materials Research Bulletin*, **2023**, 160, 112135.
28. Z. Wu, J. Yang, X. Sun, Y. Wu, L. Wang, G. Meng, Y. He, *Sensors and Actuators B: Chemical*, **2021**,337, 129772.
29. S. A. Chizhov, N. M. Rumyantseva, A. K. Drozdov, V. I. Krylov, M. Batuk, J. Hadermann and M. A. Gaskov *Sensors and Actuators B: Chemical*, **2021**, 329, 129035.
30. X. Xiang, H. Ouyang, J. Li and Z. Fu, *Sensors and Actuators B: Chemical*, **2021**, 346, 130547.

31. S. Huang, M. Guo, J. Tan, Y. Geng, J. Wu, Y. Tang, Y. Liang, *ACS applied materials & interfaces*, **2021**, 10, 39056-39063.
32. H. Shan, W. Xuan, Z. Li, D. Hu, X. Gu and S. Huang, *ACS Applied Nano Materials*, **2022**, 5, 6801-6809.
33. B. Y. Fu, L. Q. Wen, T. H. Ding, N. Yang, Y. X. Chai, Y. Zhang and Q. Cao, *Microchemical Journal*, **2022**, 182, 107892.
34. S. Huang, L. Tan, L. Zhang, J. Wu, L. Zhang, Y. Tang and Y. Liang, *Sensors and Actuators B: Chemical*, **2020**, 325, 128751.
35. Y. M. Cho, S. Kim, S. I. Kim, S. E. Kim, J. Z. Wang, Y. N. Kim, M. J. Oh, *J Advanced Functional Materials*, **2020**, 30, 1907449.
36. T. Liu, J. He, Z. Lu, M. Sun, M. Wu, X. Wang, Y. Wang, *Chemical Engineering Journal*, **2022**, 429, 132462.
37. L. Tan, M. Guo, J. Tan, Y. Geng, S. Huang, Y. Tang and Y. Liang, *Sensors and Actuators B: Chemical*, **2019**, 291, 226-234.
38. X. Niu, H. Gao and J. Du, *ACS Applied Nano Materials*, **2022**, 5, 2350-2357.
39. X. Zhang, J. Lv, J. Liu, S. Xu, J. Sun, L. Wang and B. Dong, *Journal of Colloid and Interface Science*, **2022**, 616, 921-928.
40. B. Park, M. S. Kang, W. G. Lee, H. C. Kwak, M. Rethinasabapathy and S. Y. Huh, *Industrial & Engineering Chemistry Research*, **2019**, 59, 793-801.
41. Y. Shu, Q. Ye, T. Dai, J. Guan, Z. Ji, Q. Xu and X. Hu, *Journal of Hazardous Materials*, **2022**, 430, 128360.
42. J. Wang, L. Y. Hu, X. R. Zhao, L. Q. Wen, J. Wang, N. Yang and Q. Cao, *Microchemical Journal*, **2021**, 170, 106769.
43. P. Pandey, A. Sengupta, S. Parmar, U. Bansode, S. Gosavi, A. Swarnkar and S. Ogale, *ACS Applied Nano Materials*, **2020**, 3, 3305-3314.
44. H. Li, F. Li, Y. Huang, L. Zhang, M. Ye, J. Jin and X. Chen, *Chemosensors*, **2022**, 10, 170.
45. Y. Liu, X. Tang, T. Zhu, M. Deng, P.I. Ikechukwu, W. Huang and F. Qiu, *Journal of Materials Chemistry C*, **2018**, 6, 4793-4799.
46. Y. Shu, L. Sun, Y. Wang, D. Jin, Q. Xu and X. Hu, *Analyst*, **2021**, 146, 6798-6807.
47. F. Li, Y. Feng, Y. Huang, Q. Yao, G. Huang, Y. Zhu and X. Chen, *Microchimica Acta*, **2021**, 188, 1-8.

48. J. Guan, Z. Y. Shen, Y. Shu, D. Jin, Q. Xu and Y. X. Hu *Advanced Materials Interfaces*, **2021**, *81*, 2100588.
49. X. Li, Y. Yu, J. Hong, Z. Feng, X. Guan, D. Chen and Z. Zheng, *Journal of Luminescence*, **2020**, *219*, 116897.
50. L. Yueyue, S. Siqi, W. Yilin, L. Fengmin, W. Hongtao, B. Jihao and L. Geyu, *Sensors and Actuators B: Chemical*, **2022**, *368*, 132189.
51. X. Jiang, H. Zeng, C. Duan, Q. Hu, Q. Wu, Y. Yu, Y. and X. Yang, *Dalton Transactions*, **2022**, *51*, 3581-3589.
52. W. C. Hsieh, K. R. Singh, S. Som and H. C. Lu, *Chemical Engineering Journal Advances*, **2022**, *12*, 100358.
53. T. Wang, X. Wei, Y. Zong, S. Zhang and W. Guan, *Journal of Materials Chemistry C*, **2020**, *8*, 12196-12203.
54. L. Zhang, Y. Zhu, F. Li, L. Zhang, L. You, Z. Guo and X. Chen, *Chemosensors*, **2021**, *9*, 319.
55. Q. Jan, S. Nabi, A. F. Sofi and A. M. Bhat, *Spectrochimica Acta Part A: Molecular and Biomolecular Spectroscopy*, **2022**, *270*, 120749.
56. W. Xue, J. Zhong, H. Wu, J. Zhang and Y. Chi, *Analyst*, **2021**, *146*, 7545-7553.
